# Supplementary material for: Preliminary Investigation of Different Drying Systems to Preserve Hydroxytyrosol and Its Derivatives in Olive Oil Filter Cake Pressurized Liquid Extracts
Source: MDPI journal article supplement (doi:10.3390/foods10061407), 2021-06-18
Supplement: s1 [file s1]

**Table S1.** Calibration curves used in the quantification of polar compounds present in olive oil filter cake.

| Commercial standard | Calibration range (mg/L) | Calibration curve     | R <sup>2</sup> |
|---------------------|--------------------------|-----------------------|----------------|
| Quinic acid         | 0.5–20                   | $y = 142862x - 99193$ | 0.9923         |
| Hydroxytyrosol      | 0.5–20                   | $y = 33646x - 14770$  | 0.9851         |
| Oleuropein          | 0.5–20                   | $y = 272392x - 80988$ | 0.9977         |
| Pinoresinol         | 0.5–20                   | $y = 47383x - 36828$  | 0.9853         |

**Table S2.** Compositional variations of polyphenols ordered by families for each compound in all extracts, expressed in ug compound/g extract ( $X \pm SD$ ).

| Proposed compound                                                             | Drying Technique |                 |                 |
|-------------------------------------------------------------------------------|------------------|-----------------|-----------------|
|                                                                               | Vacuum-drying    | Spray-drying    | Freeze-drying   |
| <b>PHENOLIC COMPOUNDS</b>                                                     |                  |                 |                 |
| <b>Total Phenolic Alcohols</b>                                                | 12665 $\pm$ 48   | 10364 $\pm$ 243 | 24066 $\pm$ 488 |
| <b>Total Non-oxidized Phenolic Alcohols</b>                                   | 6407 $\pm$ 289   | 3705 $\pm$ 69   | 13025 $\pm$ 102 |
| Hydroxytyrosol                                                                | 1548 $\pm$ 116   | 421 $\pm$ 15    | 2620 $\pm$ 83   |
| Oxidized hydroxytyrosol                                                       | 6258 $\pm$ 242   | 6659 $\pm$ 215  | 11041 $\pm$ 456 |
| Hydroxytyrosol acetate                                                        | 4859 $\pm$ 179   | 3284 $\pm$ 54   | 10405 $\pm$ 146 |
| <b>Total Secoiridoids</b>                                                     | 2320 $\pm$ 82    | 2202 $\pm$ 22   | 4654 $\pm$ 14   |
| Secoiridoid derivative                                                        | 753 $\pm$ 27     | 631 $\pm$ 2     | 1012 $\pm$ 36   |
| Hydroxy oleuropein aglycon                                                    | 620 $\pm$ 28     | 532 $\pm$ 11    | 1235 $\pm$ 15   |
| Hydroxy decarboxymethyl-ligstroside aglycone                                  | 227 $\pm$ 11     | 270 $\pm$ 5     | 770 $\pm$ 14    |
| Oleuropein aglycone derivative                                                | 412 $\pm$ 12     | 435 $\pm$ 19    | 961 $\pm$ 29    |
| Comselogoside                                                                 | 308 $\pm$ 7      | 334 $\pm$ 6     | 676 $\pm$ 57    |
| 6-O-[(2E)-2,6-Dimethyl-8-hydroxy-2-octenoyloxy] secologanoside                | NQ               | NQ              | NQ              |
| <b>Total Phenolic Alcohols + Secoiridoids</b>                                 | 14986 $\pm$ 130  | 12566 $\pm$ 265 | 28720 $\pm$ 492 |
| <b>Total Non-oxidized Phenolic Alcohols + Secoiridoids</b>                    | 8727 $\pm$ 367   | 5907 $\pm$ 83   | 17679 $\pm$ 93  |
| <b>Total Lignans</b>                                                          | 1316 $\pm$ 39    | 1131 $\pm$ 19   | 2018 $\pm$ 36   |
| (+)-Acetoxypinoresinol                                                        | 1316 $\pm$ 39    | 1131 $\pm$ 19   | 2018 $\pm$ 36   |
| <b>Total Phenolic Compounds</b>                                               | 16301 $\pm$ 94   | 13697 $\pm$ 248 | 30738 $\pm$ 630 |
| <b>PHENOLIC COMPOUNDS DERIVATIVES (non-phenolic molecules)</b>                |                  |                 |                 |
| <b>Total oleosides, elenolic acids and derivatives</b>                        | 1601 $\pm$ 61    | 1470 $\pm$ 36   | 3047 $\pm$ 11   |
| Hydroxylated product of the dialdehydic form of decarboxymethyl-elenolic acid | NQ               | NQ              | NQ              |
| Elenolic acid or isomer 1                                                     | 182 $\pm$ 6      | 156 $\pm$ 4     | 324 $\pm$ 7     |
| Elenolic acid or isomer 2                                                     | 437 $\pm$ 18     | 495 $\pm$ 9     | 961 $\pm$ 10    |

|                                                      |            |           |            |
|------------------------------------------------------|------------|-----------|------------|
| Aldehydic form of<br>decarboxymethyl elenolic acid   | 148 ± 3    | 113 ± 1   | 423 ± 6    |
| Dialdehydic form of<br>decarboxymethyl elenolic acid | NQ         | NQ        | NQ         |
| Oleoside                                             | 833 ± 34   | 706 ± 27  | 1338 ± 24  |
| <b>OTHER POLAR COMPOUNDS</b>                         |            |           |            |
| Quinic acid                                          | 6357 ± 619 | 3620 ± 40 | 2758 ± 212 |
| <b>Total other polar compounds</b>                   | 6357 ± 619 | 3620 ± 40 | 2758 ± 212 |

NQ, not quantitated.

**Table S3.** Statistical data of the Drying-PLE extraction conditions for phenolic compounds.

| Drying system                   | Hydroxytyrosol                                   | Hydroxytyrosol acetate                 | Oxidized hydroxytyrosol                           | Secoiridoid derivative    | Hydroxy oleuropein aglycon | Hydroxy decarboxymethyl-ligstroside aglycone | Oleuropein aglycone derivative | Comselogoside                      |
|---------------------------------|--------------------------------------------------|----------------------------------------|---------------------------------------------------|---------------------------|----------------------------|----------------------------------------------|--------------------------------|------------------------------------|
| Spray-drying/<br>Vacuum-drying  | 1                                                | 1                                      | 0                                                 | 1                         | 1                          | 1                                            | 0                              | 0                                  |
| Freeze-drying/<br>Vacuum-drying | 1                                                | 1                                      | 1                                                 | 1                         | 1                          | 1                                            | 1                              | 1                                  |
| Freeze-drying/<br>Spray-drying  | 1                                                | 1                                      | 1                                                 | 1                         | 1                          | 1                                            | 1                              | 1                                  |
| Drying system                   | Oleoside                                         | Elenolic acid or isomer 1              | Dialdehydic form of decarboxymethyl-elenolic acid | Elenolic acid or isomer 2 | Total phenolic alcohols    | Total secoiridoids                           | Total lignans                  | Total phenolic alcohols + secoirid |
| Spray-drying/<br>Vacuum-drying  | 1                                                | 1                                      | 0                                                 | 1                         | 1                          | 0                                            | 1                              | 1                                  |
| Freeze-drying/<br>Vacuum-drying | 1                                                | 1                                      | 1                                                 | 1                         | 1                          | 1                                            | 1                              | 1                                  |
| Freeze-drying/<br>Spray-drying  | 1                                                | 1                                      | 1                                                 | 1                         | 1                          | 1                                            | 1                              | 1                                  |
| Drying system                   | Total non oxidized phenolic alcohols + secoirids | Oleosides + Elenolic acids derivatives | Total phenolic compounds                          |                           |                            |                                              |                                |                                    |
| Spray-drying/<br>Vacuum-drying  | 1                                                | 1                                      | 1                                                 |                           |                            |                                              |                                |                                    |
| Freeze-drying/<br>Vacuum-drying | 1                                                | 1                                      | 1                                                 |                           |                            |                                              |                                |                                    |
| Freeze-drying/<br>Spray-drying  | 1                                                | 1                                      | 1                                                 |                           |                            |                                              |                                |                                    |

1 indicated that the means difference was significant at the 0.05 level.  
0 indicated that the means difference was not significant at the 0.05 level.
